# Supplementary material
Source: PubMed Central journal article supplement (PMC4123210)
Supplement: NIHMS464156-supplement-Supplement1.pdf [file NIHMS464156-supplement-Supplement1.pdf]

## Supplementary Appendix

This appendix has been provided by the authors to give readers additional information about their work.

Supplement to: Wang P-Y, Ma W, Park J-Y, et al. Increased oxidative metabolism in the Li-Fraumeni syndrome. *N Engl J Med* 2013;368:1027-32. DOI: 10.1056/NEJMoa1214091

## Supplementary Appendix

Supplement to: Wang, P-y, et al.

Increased Oxidative Metabolism in the Li-Fraumeni Syndrome

### Contents

|                |         |
|----------------|---------|
| Methods        | page 2  |
| Table S1       | page 7  |
| Figure S1 - S6 | page 8  |
| References     | page 14 |

## **Supplementary Methods**

### ***TP53* genetic testing centers for the LFS family members**

- 1) Genetic Diagnostic Laboratory, Department of Genetics, University of Pennsylvania School of Medicine, Philadelphia, PA
- 2) Clinical Molecular Diagnostic Laboratory, City of Hope National Medical Center, City of Hope, Duarte, CA
- 3) Clinical Cancer Genetics, MD Anderson Cancer Center, Houston, TX
- 4) DNA Diagnostic Laboratory, Baylor College of Medicine, Houston, TX
- 5) Quest Diagnostics Nichols Institute, San Juan Capistrano, CA
- 6) Molecular Genetics Lab, British Columbia Cancer Agency, Vancouver, Canada
- 7) Molecular Oncology and Cancer Genetics Laboratory, Huntington Medical Research Institutes, Pasadena, CA

### **Phosphorus-31 magnetic resonance spectroscopy of skeletal muscle**

The tibialis anterior muscle of the supine subject was studied at 7.5 sec time resolution in a 3-T MRI scanner (GE Healthcare, Waukesha, WI). A 3-inch diameter  $^{31}\text{P}$  surface coil was placed over the tibialis anterior muscle, about one-third the distance from the origin of the tibialis anterior muscle (lateral condyle) to the medial malleolus of the dominant leg. Submaximal exercise was performed by dorsiflexing (~40 times over 2 min) against an adapted custom-built pedal that was attached via a pulley system to 30% of the maximum lifted weight by the subject<sup>1</sup>.  $^{31}\text{P}$  spectra were continuously obtained at rest, during exercise and recovery for 3 min, 2 min and 6 min, respectively. The spectra were acquired using a non-selective RF pulse (184  $\mu\text{s}$

duration, 2500 Hz spectral width, 2048 data points, 1.25 s repetition time and 6 excitations) and processed with 5 Hz line broadening, zero filling, Fourier transformation and baseline and phase corrections. PCr peak amplitudes during the recovery period were determined by lineshape analysis. The average PCr lineshape during 2.5 - 3.75 min of the recovery period was used as the model lineshape. Post-exercise PCr amplitudes (7.5 s – 3.725 min, 29 data points) were fitted to a single exponential curve and used to calculate the PCr recovery time constant ( $T_c$ )<sup>2</sup>. Spectral processing, lineshape analysis and curve fitting were performed using SAGE 7 (GE Healthcare) and IDL (version 6.4, Exelis Visual Information Solutions) software.

### **Metabolic exercise stress testing and oxygen consumption at ventilatory threshold**

Symptom-limited metabolic (cardiopulmonary) exercise stress testing was performed on a treadmill with a conservative ramping protocol to determine peak oxygen consumption ( $VO_2$ ) at ventilatory threshold<sup>3</sup>. Through the use of a metabolic cart (Vmax Spectra 229C, Sensormedics, Yorbal Linda, CA), minute ventilation,  $VO_2$ , and carbon dioxide output were acquired breath-by-breath, and averaged over 10-second intervals. The metabolic cart was calibrated according to manufacturer specifications prior to each test.  $VO_2$  at ventilatory threshold was determined by the ventilatory equivalents method<sup>4</sup>.

### **Cell culture**

Primary human skeletal muscle myoblasts were isolated from vastus lateralis muscle needle biopsy specimens, treated with trypsin/collagenase and cultured in DMEM (GlutaMax-I, Invitrogen) supplemented with 20% FBS and 2  $\mu$ M uridine<sup>5</sup>. Human lymphocytes were

prepared as previously described<sup>6</sup>. Briefly, peripheral blood mononuclear cells (PMBCs) were collected by density centrifugation using citrate-containing Vacutainer CPT tubes (Becton Dickinson). PMBCs were activated on immobilized anti-CD3 and anti-CD28 antibodies for 3 days and subsequently cultured in RPMI media supplemented with IL-2 (10 U/ml).  $3 \times 10^5$  T cells were seeded in XF-96 plates coated with Cell-Tak and analyzed as described<sup>7</sup>. Mouse embryo fibroblasts (MEF) were isolated from 13.5 to 14.5-day embryos using standard protocols<sup>8</sup>.

## **Mice**

All mice were maintained and handled in accordance with the NHLBI Animal Care and Use Committee. The p53 R172H mouse (strain 01XL9, NCI Frederick Mouse Repository<sup>9</sup>) was backcrossed at least five generations into a C57BL/6 background. All mice were healthy, tumor-free male, age-matched at ~10-11 wk unless stated otherwise.

## **Mouse exercise and metabolic testing**

Approximately 10 wk-old male mice were used for the treadmill exercise test as described previously<sup>8</sup>. While concurrently monitoring food intake and activity, indirect calorimetry was used to measure basal metabolism after a 2 d minimum period of acclimation (Columbia Instruments). Light and dark cycles of the day were 12-hr periods starting at 6 am and 6 pm, respectively. The data presented are the average of two 12-hr periods for each group of mice.

## **Mitochondrial studies**

Mitochondria were isolated from tissues using standard techniques <sup>10</sup>. The Seahorse XF metabolic analyzer (Seahorse Bioscience) or Clark-type oxygen microelectrode was used for either whole cell or isolated mitochondrial oxygen consumption studies at 37°C as previously described <sup>8, 10, 11</sup>. Trifluorocarbonyl cyanide phenylhydrazine (FCCP) at 1 μM concentration was used to measure uncoupled respiration.

### **Protein western blotting**

Protein samples were solubilized in cold lysis buffer with protease inhibitor cocktail (Roche), resolved by Tris-glycine SDS PAGE, and transferred to Immobilon-P membrane (Millipore) for standard ECL western blotting.

### **mRNA quantification by real-time RT-PCR**

RNA was isolated from tissue culture cells by solubilizing in lysis buffer using the poly(dT) magnetic bead system (Invitrogen), reverse transcribed using Superscript II (Invitrogen), and quantified by real-time polymerase chain reaction using SYBR green fluorescence on a 7900HT Sequence Detection System (Applied Biosystems) (RT-PCR) <sup>12</sup>.

### **List of antibodies**

Antibodies used were as follows: Mouse monoclonal anti-p53 (DO-1) and anti-actin (Santa Cruz); rabbit polyclonal anti-SCO2 <sup>13</sup>; anti-human TFAM (Abcam); rabbit polyclonal anti-mouse TFAM (a generous gift from Dr. Eric A. Shoubridge, McGill University); mouse monoclonal anti-mitochondrial MTCO1, MTCO2, SDHA, NDUFA 9, VDAC1 (Molecular Probes); rabbit

polyclonal anti-BAX (Cell Signaling); mouse monoclonal anti-p21 (Calbiochem); mouse monoclonal anti-tubulin (Clone B-5-1-2, Sigma).

### **List of real-time PCR primer sequences for mRNA analysis**

mRNA quantification primers:

Mouse:

SCO2

F 5'-CAGCCTGTCTTCATCACTGTGGA

R 5'-GACACTGTGGAAGGCAGCTATGTGCC

TFAM

F 5'-CTGATGGGTATGGAGAAGGAGG

R 5'-CCAACTTCAGCCATCTGCTCTTC

p21

F 5'-AGGGCAACTTCGTCTGGGAG

R 5'-TTGGAGACTGGGAGAGGGCA

TIF,

F 5'-CTGAGGATGTGCTGTCTGGGAA

R 5'-CCTTTGCCTCCACTTCGGTC

**Table S1. Characteristics of LFS mutation carrier subjects**

| Subject | p53 amino acid change | LFS family | Age | Cancer history (age at diagnosis)                      | Chemotherapy |
|---------|-----------------------|------------|-----|--------------------------------------------------------|--------------|
| 1       | R181C                 | 1          | 50  | None                                                   | No           |
| 2       | R273H                 | 2          | 39  | Breast cancer (32)                                     | Yes          |
| 3       | L130P                 | 3          | 33  | Breast cancer (25);<br>papillary thyroid cancer (31)   | Yes          |
| 4       | R181C                 | 1          | 53  | Melanoma (48);<br>renal cell cancer (50)               | No           |
| 5       | R181C                 | 1          | 60  | None                                                   | No           |
| 6       | R181C                 | 1          | 38  | None                                                   | No           |
| 7       | R181C                 | 1          | 50  | None                                                   | No           |
| 8       | R181C                 | 1          | 45  | Breast cancer (43)                                     | Yes          |
| 9       | R181C                 | 1          | 19  | None                                                   | No           |
| 10      | P222L;<br>R267W       | 4          | 43  | None                                                   | No           |
| 11*     | P72R                  | 5          | 52  | Dermatofibroma (25);<br>breast cancer (27, 28)         | Yes          |
| 12      | Y220C;<br>P72R        | 6          | 31  | Adrenocortical carcinoma (7 mo);<br>breast cancer (25) | Yes          |
| 13      | 122X                  | 7          | 23  | Breast cancer (20)                                     | Yes          |
| 14      | 122X                  | 7          | 20  | Breast cancer (15)                                     | Yes          |
| 15      | 122X                  | 7          | 21  | Jaw osteosarcoma (12);<br>breast cancer (17,19)        | Yes          |
| 16      | R273H                 | 8          | 26  | None                                                   | No           |
| 17      | 214X                  | 9          | 31  | Breast cancer (25)                                     | Yes          |
| 18      | R283C                 | 10         | 29  | None                                                   | No           |
| 19      | R342X                 | 11         | 33  | Breast cancer (26)                                     | Yes          |
| 20      | R342X                 | 11         | 56  | Foot fibrosarcoma (3);<br>prostate cancer (52)         | No           |

\*Subject 11 also had *TP53* non-coding sequence changes (IVS2+3 C->G; IVS5+1 G->A) reported to be associated with LFS <sup>14</sup>.



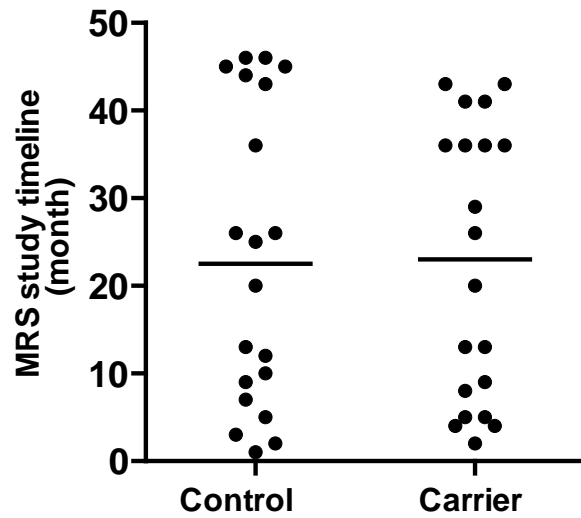

**Figure S1. The MRS study timeline for control and LFS mutation carrier subjects.** The date of the first scanned subject was designated as month one. The horizontal lines indicate the median value for the control (n = 20) and carrier (n = 20) groups: 22.5 versus 23.0 months, respectively.  $p = 0.75$  by Mann-Whitney test.

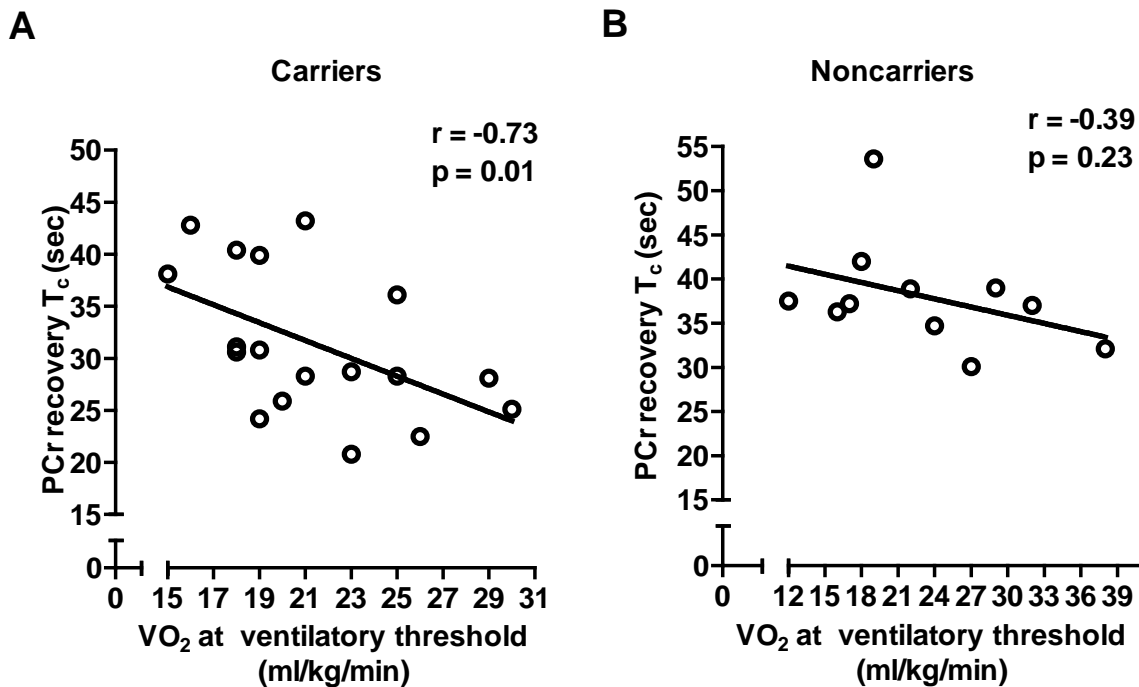

**Figure S2. Correlation between PCr recovery time constant ( $T_c$ ) and oxygen consumption in humans.** (A) Individuals carrying LFS p53 mutations underwent cardiopulmonary exercise testing and their  $VO_2$  at ventilatory threshold was determined as an index of submaximal aerobic endurance. Out of the 20 carrier subjects, two subjects were excluded from this analysis because of one individual with a leg amputation and another with severe obesity. Statistical analysis was performed using the two-tailed Pearson correlation coefficient method ( $n = 18$ ). (B) Correlation between PCr  $T_c$  and  $VO_2$  at ventilatory threshold in non-carrier LFS family members. This correlation did not reach significance likely due to the smaller number of control subjects who underwent metabolic exercise testing ( $n = 11$ ).

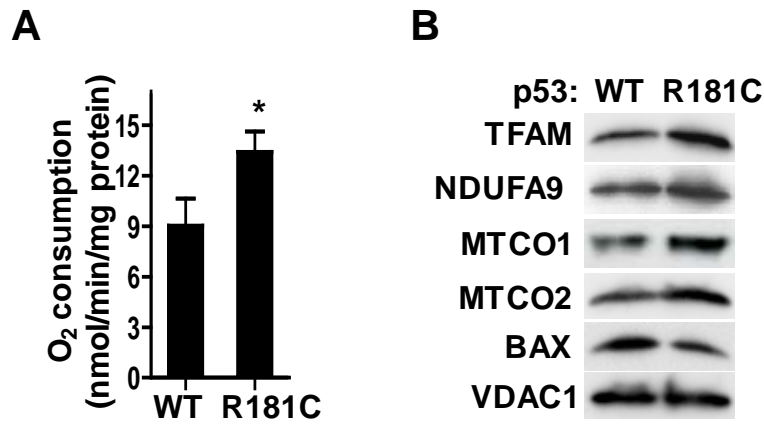

**Figure S3. Increased oxygen consumption and mitochondrial biogenesis in human myoblasts harboring the *TP53* R181C mutation.** (A) Oxygen consumption of 7 pairs of carrier (R181C) and non-carrier (WT) myoblasts from the same LFS family using a standard Clark-type oxygen electrode. (B) Mitochondria were isolated from pooled myoblasts of carrier or non-carrier family members and immunoblotted with the indicated antibodies. The lower level of BAX protein serves as a control for the R181C mutation as it has previously been shown to display loss of apoptotic activity (IARC TP53 database). Values shown as mean  $\pm$  SEM, \* $p < 0.05$ .

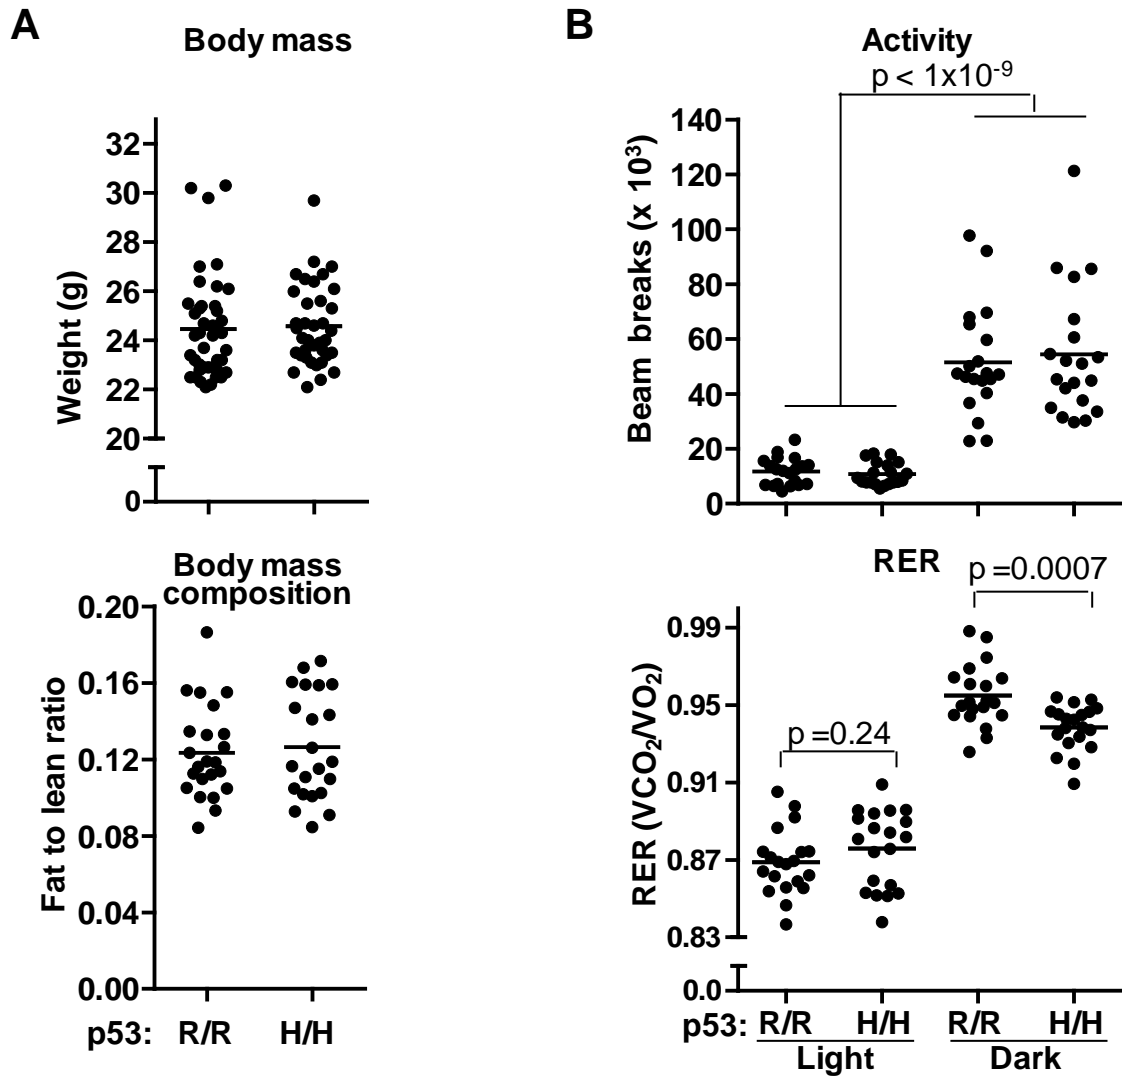

**Figure S4. Metabolic characterization of the mouse model of LFS.** (A) Body mass (g) of ~10 wk old male mice ( $n \geq 37$ ,  $p = 0.78$ ) and body mass composition measured by NMR expressed as fat to lean ratio in 10 wk old male mice with two copies of the LFS mutation *p53* R172H (H/H) (homologous to human R175H) compared to wild-type mice (R/R) ( $n \geq 22$ ,  $p = 0.70$ ). (B) Activity measured by beam breaks and respiratory exchange ratios (RER) during indicated cycle of the day ( $n = 20$ , ~10 wk old male mice). Light cycle, 6 am to 6 pm; dark cycle, 6 pm to 6 am. The horizontal lines indicate the mean value.  $p$  values for the activity between R/R and H/H mice were not significantly different. Both the activity and RER of the mice in the dark cycle are significantly different from that in the light cycle ( $p < 1 \times 10^{-9}$ ).

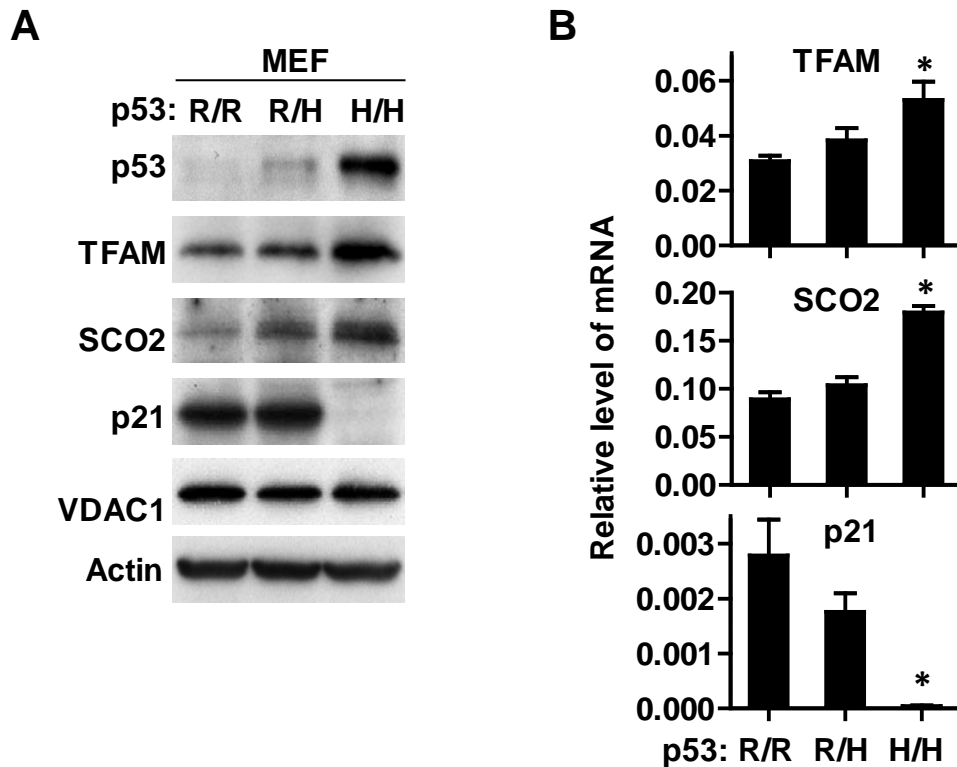

**Figure S5. *p53* R172H mutation promotes mitochondrial biogenesis in mouse embryo fibroblasts (MEF).** (A) Immunoblots of MEF cell lysates. Actin and VDAC1 were used as protein loading controls for whole cell lysates and mitochondria, respectively. (B) Effect of *p53* R172H genotype on MEF mRNA levels of the indicated genes by RT-PCR ( $n = 4$ ). Note that p21 mRNA levels serve as a control to show loss of wild-type *p53* transcriptional activity by the *p53* R172H mutation. The bars represent mean  $\pm$  SEM. \*  $p < 0.05$  compared to wild-type (R/R).

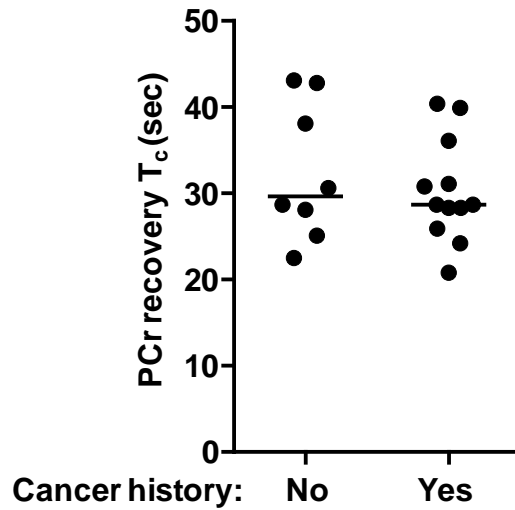

**Figure S6. Comparison of PCr recovery T<sub>c</sub> of LFS mutation carriers with or without past medical history of cancer.** Of the 12 individuals with cancer history, 10 had also received chemotherapy (Table S1). The horizontal lines indicate the median value.  $p = 0.73$  by Mann-Whitney test.

## Supplementary References

1. Sheehan FT, Seisler AR, Siegel KL. In vivo talocrural and subtalar kinematics: a non-invasive 3D dynamic MRI study. *Foot Ankle Int* 2007;28:323-35.
2. Argov Z, Lofberg M, Arnold DL. Insights into muscle diseases gained by phosphorus magnetic resonance spectroscopy. *Muscle Nerve* 2000;23:1316-34.
3. Arena R, Humphrey R, Peberdy MA, Madigan M. Predicting peak oxygen consumption during a conservative ramping protocol: implications for the heart failure population. *J Cardiopulm Rehabil* 2003;23:183-9.
4. Balady GJ, Arena R, Sietsema K, et al. Clinician's Guide to cardiopulmonary exercise testing in adults: a scientific statement from the American Heart Association. *Circulation* 2010;122:191-225.
5. Yasin R, Van Beers G, Nurse KC, Al-Ani S, Landon DN, Thompson EJ. A quantitative technique for growing human adult skeletal muscle in culture starting from mononucleated cells. *J Neurol Sci* 1977;32:347-60.
6. Jackson SH, Devadas S, Kwon J, Pinto LA, Williams MS. T cells express a phagocyte-type NADPH oxidase that is activated after T cell receptor stimulation. *Nat Immunol* 2004;5:818-27.
7. van der Windt GJ, Everts B, Chang CH, et al. Mitochondrial respiratory capacity is a critical regulator of CD8+ T cell memory development. *Immunity* 2012;36:68-78.
8. Park JY, Wang PY, Matsumoto T, et al. p53 improves aerobic exercise capacity and augments skeletal muscle mitochondrial DNA content. *Circ Res* 2009;105:705-12, 11 p following 12.
9. Lang GA, Iwakuma T, Suh YA, et al. Gain of function of a p53 hot spot mutation in a mouse model of Li-Fraumeni syndrome. *Cell* 2004;119:861-72.
10. Frezza C, Cipolat S, Scorrano L. Organelle isolation: functional mitochondria from mouse liver, muscle and cultured fibroblasts. *Nat Protoc* 2007;2:287-95.
11. Zhang J, Nuebel E, Wisidagama DR, et al. Measuring energy metabolism in cultured cells, including human pluripotent stem cells and differentiated cells. *Nat Protoc* 2012;7:1068-85.
12. Patino WD, Mian OY, Kang JG, et al. Circulating transcriptome reveals markers of atherosclerosis. *Proc Natl Acad Sci U S A* 2005;102:3423-8.
13. Matoba S, Kang JG, Patino WD, et al. p53 regulates mitochondrial respiration. *Science* 2006;312:1650-3.
14. Hsu HC, Huang AM, Lai PL, Chien WM, Peng SY, Lin SW. Genetic alterations at the splice junction of p53 gene in human hepatocellular carcinoma. *Hepatology* 1994;19:122-8.
